# Supplementary material for: Tumor suppression in basal keratinocytes via dual non-cell-autonomous functions of a Na,K-ATPase beta subunit
Source: eLife. 2016 May 30;5:e14277. doi: 10.7554/eLife.14277 (PMC4973367; doi:10.7554/eLife.14277)
Supplement: Figure 2—figure supplement 2–source data 1. — Quantification of the phenotypes of embryos obtained from in-crosses of psoriasis /- fish injected with pu.1 MO and un-injected controls. Numbers and percentage of psoriasis mutants obtained with pericardial edema (pe), edema and weak aggregates (weak), edema and medium aggregates (medium), and edema and strong aggregates (strong). DOI: http://dx.doi.org/10.7554/eLife.14277.007 [file elife-14277-fig2-figsupp2-data1.xlsx]

## Sheet: Figure 2 supplement 2e
Quantification of phenotypes of embryos obtained from in-crosses of psoriasis +/- fish injected with pu.1 MO and un-injected controls
	scored embryos
	wt	pe	weak	medium	strong	n	n -/-
control	46	4	4	8	2	64	18
pu1 injected	43	4	2	9	1	59	16
	percentage
	wt	pe	weak	medium	strong
control	71.875	6.25	6.25	12.5	3.125
pu1 injected	72.8814	6.77966	3.38983	15.2542	1.69492
	percentage of mutants
control		22.2222	22.2222	44.4444	11.1111
pu1 injected		25	12.5	56.25	6.25
