# Supplementary material for: Tumor suppression in basal keratinocytes via dual non-cell-autonomous functions of a Na,K-ATPase beta subunit
Source: eLife. 2016 May 30;5:e14277. doi: 10.7554/eLife.14277 (PMC4973367; doi:10.7554/eLife.14277)
Supplement: Figure 4—source data 1. — Source data for Figure 4c. Heart beat score of psoriasis mutants and their wt siblings. Mutants are indicated in yellow. p values are determined using an unpaired two-tailed Student’s t-test. Source data for Figure 4f. Quantification of the mean fluorescence intensity of Rhodamin dextran of a defined area in confocal images, determined with ImageJ software. p values are determined using an unpaired two-tailed Student’s t-test. DOI: http://dx.doi.org/10.7554/eLife.14277.014 [file elife-14277-fig4-data1.xlsx]

## Sheet: Fig. 4c
heart beat rate
	embryo	32 hpf, heart beat per 15 sec, scored 3x per embryo			per minute, 32 hpf	36 hpf, heart beat per 15 sec, scored 2 x per embryo		per minute, 36 hpf	50 hpf, heart beat per 15 sec, scored 3x per embryo			per minute, 50 hpf
	A1	25	25	24	98.6667	30	32	124	27	27	27	108
	A2	25	22	26	97.3333	34	34	136	32	31	31	125.333
	A3	27	26	24	102.667	38	38	152	36	34	35	140
	A4	24	24	23	94.6667	36	38	148	35	36	36	142.667
	A5	26	26	26	104	36	36	144	34	35	34	137.333
	A6	26	24	24	98.6667	33	31	128	29	29	29	116
	A7	23	24	24	94.6667	35	34	138	33	32	34	132
	A8	23	23	23	92	31	29	120	27	26	25	104
	A9	19	23	23	86.6667	31	31	124	35	31	31	129.333
	A10	26	25	25	101.333	35	34	138	35	35	34	138.667
	A11	25	25	26	101.333	33	36	138	35	35	34	138.667
	A12	27	27	27	108	35	34	138	34	35	35	138.667
	B1	28	27	26	108	35	36	142	35	35	35	140
	B2	26	26	26	104	31	31	124	32	32	34	130.667
	B3	25	27	27	105.333	34	32	132	34	33	32	132
	B4	26	25	25	101.333	24	24	96	25	25	25	100
	B5	20	20	20	80	28	29	114	24	24	23	94.6667
	B6	22	22	20	85.3333	28	29	114	23	24	24	94.6667
	B7	24	24	24	96	33	33	132	33	35	30	130.667
	B8	27	29	27	110.667	32	34	132	32	32	31	126.667
	B9	26	26	27	105.333	25	24	98	17	16	17	66.6667
	B10	23	22	22	89.3333	26	25	102	21	22	23	88
	B11	26	26	24	101.333	32	33	130	33	30	31	125.333
	B12	26	27	26	105.333	37	35	144	33	33	34	133.333
	C1	28	29	27	112	33	34	134	35	34	24	124
	C2	27	28	26	108	33	34	134	32	33	31	128
	C3	31	29	28	117.333	33	32	130	36	35	35	141.333
	C4	28	28	29	113.333	34	32	132	36	35	35	141.333
	C5	28	28	29	113.333	34	32	132	34	34	34	136
	C6	28	26	25	105.333	32	31	126	36	33	34	137.333
	C7	30	27	28	113.333	36	36	144	35	33	33	134.667
	C8	27	27	26	106.667	29	29	116	32	32	32	128
	C9	24	25	24	97.3333	27	27	108	27	28	26	108
	C10	26	27	24	102.667	29	28	114	25	25	24	98.6667
	C11	28	27	28	110.667	31	33	128	32	33	35	133.333
	C12	29	29	26	112	28	28	112	20	21	19	80
		per minute, 32 hpf	per minute, 35 hpf	per minute, 50 hpf			per minute, 32 hpf	per minute, 35 hpf	per minute, 50 hpf
mutants	A1	98.6667	124	108		A1	98.6667	124	108
	A2	97.3333	136	125.333		A2	97.3333	136	125.333
	A3	102.667	152	140		A6	98.6667	128	116
	A4	94.6667	148	142.667		A8	92	120	104
	A5	104	144	137.333		B4	101.333	96	100
	A6	98.6667	128	116		B5	80	114	94.6667
	A7	94.6667	138	132		B6	85.3333	114	94.6667
	A8	92	120	104		B9	105.333	98	66.6667
	A9	86.6667	124	129.333		B10	89.3333	102	88
	A10	101.333	138	138.667		C9	97.3333	108	108
	A11	101.333	138	138.667		C10	102.667	114	98.6667
	A12	108	138	138.667		C12	112	112	80
	B1	108	142	140
	B2	104	124	130.667		A3	102.667	152	140
	B3	105.333	132	132		A4	94.6667	148	142.667
	B4	101.333	96	100		A5	104	144	137.333
	B5	80	114	94.6667		A7	94.6667	138	132
	B6	85.3333	114	94.6667		A9	86.6667	124	129.333
	B7	96	132	130.667		A10	101.333	138	138.667
	B8	110.667	132	126.667		A11	101.333	138	138.667
	B9	105.333	98	66.6667		A12	108	138	138.667
	B10	89.3333	102	88		B1	108	142	140
	B11	101.333	130	125.333		B2	104	124	130.667
	B12	105.333	144	133.333		B3	105.333	132	132
	C1	112	134	124		B7	96	132	130.667
	C2	108	134	128		B8	110.667	132	126.667
	C3	117.333	130	141.333		B11	101.333	130	125.333
	C4	113.333	132	141.333		B12	105.333	144	133.333
	C5	113.333	132	136		C1	112	134	124
	C6	105.333	126	137.333		C2	108	134	128
	C7	113.333	144	134.667		C3	117.333	130	141.333
	C8	106.667	116	128		C4	113.333	132	141.333
	C9	97.3333	108	108		C5	113.333	132	136
	C10	102.667	114	98.6667		C6	105.333	126	137.333
	C11	110.667	128	133.333		C7	113.333	144	134.667
	C12	112	112	80		C8	106.667	116	128
		30 hpf	35 hpf	50 hpf		C11	110.667	128	133.333
	average sib	105.167	134.667	134.167
	average mut	96.6667	113.833	98.6667
	standard deviation sib	7.16742	8.37526	5.5159
	standard deviation mut	8.83519	11.9836	15.766
	p value	0.00383644	6.77095e-07	1.1935e-11

## Sheet: Fig. 4f
Quantification of mean fluorescence intensity
	sibling	mutant
1	51.899	100.373
2	34.707	64.071
3	57.988	85.46
average	48.198	83.3013
standard deviation	12.0737	18.247
p value	0.0498773
