# Supplementary material for: Tumor suppression in basal keratinocytes via dual non-cell-autonomous functions of a Na,K-ATPase beta subunit
Source: eLife. 2016 May 30;5:e14277. doi: 10.7554/eLife.14277 (PMC4973367; doi:10.7554/eLife.14277)
Supplement: Figure 5—source data 1. — Source data for Figure 5i. Quantification of phenotypes of embryos obtained from incross of two psoriasis /- parents raised in E3 medium, E3 medium 250 mM mannitol, and Ringer's solution. Source data for Figure 5k. Quantification of BrdU-labeled cells. p values are determined using an unpaired two-tailed Student’s t-test. DOI: http://dx.doi.org/10.7554/eLife.14277.016 [file elife-14277-fig5-data1.xlsx]

## Sheet: Fig. 5i
Quantification of embryos obtained from incross of two psoriasis +/- parents raised in E3, E3 +250 mM Mannitol, and Ringer's solution
	scored embryos
	wt	heart edema	heart edema +aggregates	sum
e3	93	4	25	122
mannitol	86	0	0	86
ringers	87	0	0	87
	percentage
	wt	heart edema	heart edema +aggregates
e3	76.2295	3.27869	20.4918
mannitol	100	0	0
ringers	100	0	0

## Sheet: Fig. 5k (2)
Quantification of of BrdU-positive cells
embryo	wt e3	atp1b1a MO E3	wt mannitol	atp1b1a MO mannitol
1	11	94	4	11
2	15	155	20	21
3	13	69	13	24
4		43		6
5				12
6				4
7				4
average	13	90.25	12.3333	11.7143	average
standard deviation	1.1547	23.9631	4.63081	3.04501
p value
a	wt e3 vs atp MO e3	0.0416283
b	wt mannitol vs atp MO mannitol	0.913987
c	wt e3 vs wt mannitol	0.895659
d	atp MO e3 vs atp MO mannitol	0.00170658
