# Supplementary material for: Tumor suppression in basal keratinocytes via dual non-cell-autonomous functions of a Na,K-ATPase beta subunit
Source: eLife. 2016 May 30;5:e14277. doi: 10.7554/eLife.14277 (PMC4973367; doi:10.7554/eLife.14277)
Supplement: Figure 7—figure supplement 1–source data 1. — Quantification of phenotypes of control, Wortmannin-, Rapamycin- or Withaferin A-treated embryos co-injected with sub-phenotypic amounts of atp1b1a MO and lgl2 MO. DOI: http://dx.doi.org/10.7554/eLife.14277.023 [file elife-14277-fig7-figsupp1-data1.xlsx]

## Sheet: Fig. 7-Supplement1h
Quantification of phenotypes of 54 hpf atp1b1a; lgl2 morphant embryos treated with different drugs
	scored embryos
injected atp MO 1:100; lgl2 MO 1:20	wt	pericaridal edema	weak	strong	n
DMSO	7	3	4	9	23
Wortmannin	0	18	0	0	18
Rapamycin	4	11	0	0	15
Withaferin A	10	15	0	0	25
	percentage
injected atp MO 1:100; lgl2 MO 1:20	wt	pericaridal edema	weak	strong
DMSO	30.4348	13.0435	17.3913	39.1304
Wortmannin	0	100	0	0
Rapamycin	26.6667	73.3333	0	0
Withaferin A	40	60	0	0
