# Supplementary material for: Tumor suppression in basal keratinocytes via dual non-cell-autonomous functions of a Na,K-ATPase beta subunit
Source: eLife. 2016 May 30;5:e14277. doi: 10.7554/eLife.14277 (PMC4973367; doi:10.7554/eLife.14277)
Supplement: Figure 7—source data 1. — Quantification of phenotypes of 54 hpf embryos in synergistic enhancement studies. DOI: http://dx.doi.org/10.7554/eLife.14277.021 [file elife-14277-fig7-data1.xlsx]

## Sheet: Fig. 7q
Quantification of phenotypes of 54 hpf embryos in synergistic enhancement studies
	embryos
	wt	weak	strong	n
control	56	0	0	56
injected atp MO 1:20	0	0	38	38
injected atp MO 1:100	31	0	0	31
injected lgl2 MO 1:20	88	0	0	88
injected atp MO 1:100; lgl2 MO 1:20	14	4	19	37
	percentage
	wt	weak	strong
control	100	0	0
injected atp MO 1:20	0	0	100
injected atp MO 1:100	100	0	0
injected lgl2 MO 1:20	100	0	0
injected atp MO 1:100; lgl2 MO 1:20	37.8378	10.8108	51.3514
