# Supplementary material for: Tumor suppression in basal keratinocytes via dual non-cell-autonomous functions of a Na,K-ATPase beta subunit
Source: eLife. 2016 May 30;5:e14277. doi: 10.7554/eLife.14277 (PMC4973367; doi:10.7554/eLife.14277)
Supplement: Figure 8—figure supplement 1–source data 1. — Quantification of the phenotypes of psoriasis mutant embryos from an in-cross of psoriasis /-; krt4:atp1b1a-gfp parents, at 54 hpf, incubated in E3. pe, pericardial edema; weak, edema and weak aggregates; medium, edema and medium aggregates; strong, edema and strong aggregates. DOI: http://dx.doi.org/10.7554/eLife.14277.026 [file elife-14277-fig8-figsupp1-data1.xlsx]

## Sheet: Fig.8-Supplement1a
Quantification of phenotypes of psoriasis mutant embryos from an in-crosses of psoriasis +/- ; krt4:atp1b1a-gfp parents, 54 hpf, incubated in E3
	scored mutants
	pe	weak	medium	strong	n
psoriasis -/-	10	13	21	9	53
psoriasis -/-; krt4:atp1b1a-gfp	23	14	3	0	40
	percentage
psoriasis -/-	18.8679	24.5283	39.6226	16.9811
psoriasis -/-; krt4:atp1b1a-gfp	57.5	35	7.5	0
