# Supplementary material for: Tumor suppression in basal keratinocytes via dual non-cell-autonomous functions of a Na,K-ATPase beta subunit
Source: eLife. 2016 May 30;5:e14277. doi: 10.7554/eLife.14277 (PMC4973367; doi:10.7554/eLife.14277)
Supplement: Figure 9—figure supplement 2–source data 1. — Quantification of the mean fluorescence intensities of GFP in the posterior part of the tail fins of wt fish, atp1b1a morphants and atp1b1a morphants treated with Wortmannin, Rapamycin, and Withaferin A. Intensities were measured in maximum intensity projections of confocal images using ImageJ software. p values are determined using an unpaired two-tailed Student’s t-test. DOI: http://dx.doi.org/10.7554/eLife.14277.031 [file elife-14277-fig9-figsupp2-data1.xlsx]

## Sheet: Fig.9-Supplement 2
	NFkB:GFP
	mean fluorescence intensity of posterior tail
embryos	wt control	atp1b1a morphant	wortmannin	rapamycin	withaferin A
1	25.903	55.095	20.762	30.198	13.243
2	26.119	43.123	30.118	31.639	26.67
3	28.403	34.496	28.249	35.916	30.94
4	27.069	57.302		33.847
5	20.197	36.505		29.929
6	21.146	59.01
7	28.17	61.311
8	33.946	40.43
9	27.793	38.153
10	29.951	46.961
11		52.005
12		25.585
13		45.662
14		43.643
15		45.438
16		61.109
average	26.8697	46.6143	26.3763	32.3056	23.6177
standard deviation	3.99009	10.3907	4.95115	2.54701	9.23491
p value wt vs morphant	6.8914e-06
p value morphant DMSO vs morphant wortmannin	0.00474336
p value morphant DMSO vs morphant Rapamycin	0.00734471
p value morphant DMSO vs morphant Withaferin A	0.00239855
