# Supplementary material for: Tumor suppression in basal keratinocytes via dual non-cell-autonomous functions of a Na,K-ATPase beta subunit
Source: eLife. 2016 May 30;5:e14277. doi: 10.7554/eLife.14277 (PMC4973367; doi:10.7554/eLife.14277)
Supplement: Figure 9—source data 1. — Quantification of phenotypes of psoriasis mutants at 54 hpf, incubated in E3 medium containing 1 µM Wortmannin, 5 µM PIK90, 25 µM LY94002, 1.1 µM Rapamycin, 30 µM AZD8055, or 30 µM Withaferin A compared to the corresponding DMSO controls. pe:, pericardial edema; weak, edema and weak aggregates; medium, edema and medium aggregates; strong, edema and strong aggregates. DOI: http://dx.doi.org/10.7554/eLife.14277.028 [file elife-14277-fig9-data1.xlsx]

## Sheet: Fig. 9d
Quantification of phenotypes of embryos from in-crosses of psoriasis +/- parents, 54 hpf, incubated in E3 containing DMSO or respective drug
	scored embryos
	wt	pe	weak	medium	strong	n	n -/-
control	45	0		0	18	63	18
wortmannin	50	16	1	0	0	67	17
control	35	1	3	8	7	54	19
PIK90	33	11	0	0	0	44	11
control	22	0	0	7	4	33	11
LY	27	13	0	0	0	44	13
control	71	0	0	7	23	101	30
rapamycin	78	16	5	3	0	102	24
control	81	0	0	7	23	111	30
AZ	0	21	3	0	0	24	24
control	60	0	0	0	21	81	21
WithaferinA	61	10	14	2	1	88	27
	percentage of mutants
	pe	weak	medium	strong
control	0	0	0	100
wortmannin	94.1176	5.88235	0	0
control	5.26316	15.7895	42.1053	36.8421
PIK90	100	0	0	0
control	0	0	63.6364	36.3636
LY	100	0	0	0
control	0	0	23.3333	76.6667
rapamycin	66.6667	20.8333	12.5	0
control	0	0	23.3333	76.6667
AZ	87.5	12.5	0	0
control	0	0	0	100
WithaferinA	37.037	51.8519	7.40741	3.7037
pe: edema
weak: edema, weak aggregates
medium: edema medium aggregates
strong: edema, strong aggregates
