# Supplementary material for: Tumor suppression in basal keratinocytes via dual non-cell-autonomous functions of a Na,K-ATPase beta subunit
Source: eLife. 2016 May 30;5:e14277. doi: 10.7554/eLife.14277 (PMC4973367; doi:10.7554/eLife.14277)
Supplement: Figure 10—figure supplement 1—source data 1. — Quantification of the mean fluorescence intensities of GFP in the posterior part atp1b1a morphants and atp1b1a morphants treated with hydroxyurea. Intensities were measured in maximum intensity projections of confocal images using ImageJ software. p values are determined using an unpaired two-tailed Student’s t-test. DOI: http://dx.doi.org/10.7554/eLife.14277.035 [file elife-14277-fig10-figsupp1-data1.xlsx]

## Sheet: Fig. 10-Supplement 1
	NFkB:GFP
	mean fluorescence intensity of posterior tail
embryos	atp1b1a morphant control	atp1b1a morphant HU treated
1	19.662	17.727
2	36.271	25.77
3	39.929	25.771
4	17.603	32.574
5	22.83	24.698
6	30.146	35.775
7	19.903	56.936
8	26.715
average	26.6324	31.3216
standard deviation	8.21074	12.7005
p value	0.404865
