# Supplementary material for: Tumor suppression in basal keratinocytes via dual non-cell-autonomous functions of a Na,K-ATPase beta subunit
Source: eLife. 2016 May 30;5:e14277. doi: 10.7554/eLife.14277 (PMC4973367; doi:10.7554/eLife.14277)
Supplement: Figure 10—source data 1. — Quantification of the phenotypes of psoriasis mutants, either treated with 50 mM hydroxyurea or injected with mmp9 MO, compared to those of their respective siblings. pe, pericardial edema; weak, edema and weak aggregates; medium, edema and medium aggregates; strong, edema and strong aggregates. DOI: http://dx.doi.org/10.7554/eLife.14277.033 [file elife-14277-fig10-data1.xlsx]

## Sheet: Fig. 10e
Quantification of phenotypes of embryos obtained from incrosses of psoriasis +/- parents, either treated with 50 mM hydroxyurea, or injected with mmp9 MO
	scored embryos
	wt	pe	weak	medium	strong	n	n -/-
control	130	13	8	20	6	177	47
50 mM HU treated	91	24	3	2	0	120	29
control	122	13	10	11	5	161	39
mmp9	47	3	2	6	6	64	17
	percentage
	wt	pe	weak	medium	strong
control	73.4463	7.34463	4.51977	11.2994	3.38983
50 mM HU treated	75.8333	20	2.5	1.66667	0
control	75.7764	8.07453	6.21118	6.8323	3.10559
mmp9	73.4375	4.6875	3.125	9.375	9.375
	percentage of mutants
control		27.6596	17.0213	42.5532	12.766
50 mM HU treated		82.7586	10.3448	6.89655	0
control		33.3333	25.641	28.2051	12.8205
mmp9		17.6471	11.7647	35.2941	35.2941
pe: pericardial edema
weak: edema, weak aggregates
medium: edema medium aggregates
strong: edema, strong aggregates
